# Supplementary material for: The Odorant-Binding Proteins of the Spider Mite Tetranychus urticae
Source: MDPI journal article supplement (doi:10.3390/ijms22136828), 2021-06-25
Supplement: s1 [file s1]

## Supplementary Files

### The odorant-binding proteins of the spider mite *Tetranychus urticae*

Jiao Zhu<sup>1,2</sup>, Giovanni Renzone<sup>3</sup>, Simona Arena<sup>3</sup>, Francesca Romana Dani<sup>4</sup>, Harald Paulsen<sup>2</sup>, Wolfgang Knoll<sup>1,5</sup>, Christian Cambillau<sup>6</sup>, Andrea Scaloni<sup>3</sup>, Paolo Pelosi<sup>1</sup>

<sup>1</sup> Austrian Institute of Technology GmbH, Biosensor Technologies, Konrad-Lorenz Straße, 24, 3430 Tulln, Austria

<sup>2</sup> Faculty of Biology, Institute of Molecular Physiology, Johannes Gutenberg-Universität, 55099 Mainz, Germany

<sup>3</sup> Proteomics & Mass Spectrometry Laboratory, ISPAAM, National Research Council, Napoli, Italy

<sup>4</sup> Department of Biology, University of Firenze, via Madonna del Piano 6, 50019 Sesto Fiorentino, Italy

<sup>5</sup> Department of Physics and Chemistry of Materials, Faculty of Medicine/Dental Medicine, Danube Private University, Krems, Austria

<sup>6</sup> Architecture et Fonction des Macromolécules Biologiques (UMR 6098), CNRS, 13288 Marseille Cedex 09, France

Correspondence to: Paolo Pelosi, Austrian Institute of Technology GmbH, Biosensor Technologies, Konrad-Lorenz Straße, 24, 3430 Tulln, Austria. E.mail: [paolo.pelosi@ait.ac.at](mailto:paolo.pelosi@ait.ac.at); [ppelosi.obp@gmail.com](mailto:ppelosi.obp@gmail.com)

## Supplementary files

**Table S1.** Amino acid sequences of ticks and mites OBPs used to construct the tree of Figure 1.

```
>TurtOBP1_XP_015786166.1 uncharacterized protein LOC107363453 [Tetranychus urticae]
MKNLQSIITILCLIFGFIVSTVYSQPLGSSDSNPDTQDTKEASTSVNDKSSDQEGSSEDEDAPTPVAGPHRPPTINWGKC
PQLEPKAEKKQKADIIRTCLKSITLPENITQESVEKHRTTEVAKCALNAENWFAEDGSYRYDKAESEIKNKKLQPEIEPQ
IVNQHSECRKEAEQFPFSGIAQIQLYQACMDYHISMICGIQIVGTGYSQ
>TurtOBP2_XP_015794342.1 uncharacterized protein LOC107370892 [Tetranychus urticae]
MNYLSLCVFIIFFLTIGFSESARLPRSTSSPATSSSTTTTSSSTVNNKKNEENQPSTSSASSSAGSATGGPTINWGRCPL
EPTNEEKIKKAAVITKCLESTPVPVNITRETVELHREQVAACALRMEGWFGNGQLYRFDKAENEIKAKKLTREVEEKVLS
FHRQCKDEAEKYPVSSNQLIAQIQLYQACMDYFISEVCGIEVQIAGSEGSSE
>TurtOBP3_XP_015782945.1 uncharacterized protein LOC107360741 [Tetranychus urticae]
MFLISLCLIVLVVNSSNCAPQATPNRQGGFSGQLQGPPQPPQINWGKCPQLEPVESDKKAKADIISCLKSIALPENMTQ
ETVEKHRTTEVARCALNAENWFTEDGKYRYDKAESEIKAKKLSQEVPEQILRQHGECKEAEQGFPFSGIAQIQLYQACMDY
HISQICGITIVGPSSPQ
>TurtOBP4_XP_015791022.1 uncharacterized protein LOC107367785 [Tetranychus urticae]
MILITLCLVVLAINSSYQGPQRFLAPQPTSDQLEGSPQGGFPGQPQPPQINWGKCPQLEPKESDKKAKADIISSCI
KSIPLPENVTQESIEKHRTTEVAICALNAENWFSADMKYRYDKAESEIRAKKLVSDEPLVLRQHGECKEAEQGFPFSGIA
QVQLYQACMDYHISQICGITIVGASSPQ
>Ssca_KAF7495847 .1 hypothetical protein SSS_793 [Sarcoptes scabiei]
MMAIHQLFLTIVASLWSVMLMTAVVALPQPLNTSTNNKPADSISTASSSSIDSNVPLMASASSPSGQNLRSSSQPMLLT
LEQQQELLDQLAQLQRQTQQLLAAQQLAAVAAAAAVNGNNGVSIQTPLDGNSNNDAGSHSPITSGSIQYHRQONQQQT
HPTTQQLNNPTSNQQAIRNDNIDQGSLEQSQSKSNQNLQMINNAQNSQSQMSGLPQSPQINWGKCPQLEPSEQEKLA
KANVITKCLETTPLPANITRESVEQHREQIAGCALRSEGWFPTNGGYDFSKAEKEIRNKHLQADLENQVLNYHGQCRVES
EEKYPTSNSIIAQIQLYQACMDYFISDVCGIEVNDTDSQPF
>Ssca_KAF7496567 .1 hypothetical protein SSS_1960 [Sarcoptes scabiei]
MIANMNYALAIILLHLCDQAQSTEKLDKSKLKQQQLPQRPKIDWGKCPQLEPSEKDIKSKSNILQRCLKENPPPNQD
SITPELIIGHQKNVTECALKIENWFDKKGDKYKFEKAEKEIKNKKLSSEMOKALVGSHQDCAEVSKTQKKQSKTPMDVVEQ
VQIYQGCMDAHITQHCQIKIGA
>Dpte_XP_027195173 .1 GATA zinc finger domain-containing protein 10-like
[Dermatophagoides pteronyssinus]
MFRSIIPTLLLAMMMFIIVDANIPNHYYHQHNTSIKLASSMQQPSTQSIPLQASASQSQSNTIMNKQQQQQQHSHQHQQ
PTLLTLEQQQDLLEQLAQLQRQTQQLLAAQQLAAVAAAAAVNNNGDANSQTGGNIPASGSANIGHLHHHQHQQQPNHA
QQFGRQQSINQSNTRSSSSSSSSSSSVGHNNKPIQLQNTNGSDGNNNNNSGNNNNNGNSQTTAINNGLPQSPQINWGKCP
EPSEQEKLANKANVITKCLETTPLPTNITRESVEQHREQIACALRSEGWFPTQQGGYDFSKAEKEIKNKRLEQDLENQVLN
YHSQCRVESEDKYPTSTNSSIIAQIQLYQACMDYFISDVCGIEVNDSDVPQF
>Dpte_XP_027194279 .1 uncharacterized protein LOC113788996 [Dermatophagoides
pteronyssinus]
MKFSTIFAITLATSSMMMTVMAANKKNKIVAAASEPSTVSVPADQTPRRPKINWGRCPLQEPTEKDIESKSNILQECL
RQNPPPPQSESITQEIIHQHQQKVTETCALKIENWFDKNGEYKYSKAEKEIKNKNLAKDMEKKLLESHKQCSQIAKDRSQAV
KNMTIVEQVQVYQGCMDAHITQNCQIEISAV
>Ldel_RWS22631 .1 hypothetical protein B4U80_07214, partial [Leptotrombidium deliense]
PPQQGQQFHPQQQGGPPQQQGGPGGEPYPGSPQIYWGRCPQLEPTMDEKVKKAAVITKCLETTVPVQNTQESVEVHRE
QVAACALQMEGWFNKGLYKYDKAESEIKAKRLSKEIEERILSYHKQCKEEAEKFPVSNKALISQIQLYQACMDYFISD
VCGIDVLR
>Ldel_RWS28635 .1 hypothetical protein B4U80_06376 [Leptotrombidium deliense]
MLKTVCFLLFAIAAVKQQQPPEAPQVPVQAPPQPPQPRINWGQCPQLEPKESDKQAKAVIQGCLQKIPVPTNITQET
IVQHGREVALCALTTEQWFNEQGYRYEKAENEIKRKLGPVQIOTRIVFHHNKCQTEAKEKQDVIQEVQMYQACMDYYIA
QICGITVTTQ
>Dtin_RWS11187 .1 hypothetical protein B4U79_15176 [Dinotrombidium tinctorium]
MFHFLLLFVCFELIHCAPQRNVRLPEVNPALPQKPSTPQQLQPLNGQPRNSPQELFQLQPPQPNVRPQDQSAFPSEGP
NENNRQHNNQPPQPPPLPPIGPPQISWGQCPQLEPTMEEKIKKAAVITKCLETTVPVPTNITRESVELHREQVAACALQ
EGWFNEKGTYRFDKAESEIKNKKLQKDIENRVLTYHKQCKEEAEKFPISQNLIAQIQLYQACMDYFISEVCGIEVGPS
APAEF
>Dtin_RWS02013 .1 hypothetical protein B4U79_11820 [Dinotrombidium tinctorium]
MWKTVAVIVFFCVLFVDCQQPQEPKINWGKCSKIEPTEQDKQEKAKVIQGCLQVPLPKNVTRESVAQHGREVAVCALNA
ENWFNEEGKYRYEKAERQIKSKKLEKEIETKILFHHNCKKREAQEKTEIEEVQLYQACMDYYIAQICEITVN
>Msub_CAD7629358 .1 unnamed protein product [Medioppia subpectinata]
MEGVLTSTRLAISAFASNKDQTLLETFTVTHLLVICESGYFPVGSFALRSHLSLNTQSQLLTKMLPKLFATALLAVALLN
GIHCQQMFSQPPQAQAPSQPPQSPQPPATQGPQINWGKCPQLEPSEKEMTKAQVITKCLETTPLPQNITRDTVELHR
EQIAACALQSEGWFANNAYDFGKAETEIKNKQLTKQIEDQVLGYHKQCKEEAEKFPNTKNTVIAQIQLYQACMDYFIS
DVCIEVNEPEAPQFTGAQL
>Msub_CAD7622992 .1 unnamed protein product [Medioppia subpectinata]
MRFLLSLVFIVCALLSVSAQPKNATTIATTTQTSNTTADDKPPTINWGKCPQLEPKDSEKRAQAVLETCLQKHPIPA
NLTQQSIESHQKAIACALRAEKWFTKAGNYRFSKAETEIRAKKLQKPIESQLLANHNKNCSEAKREFPKTAIDQIQLY
```

QACVRHVTRSYGFTAFLTLNIHFQMDFHISNVCEIKVENS

>Onov\_CAD7648203 .1 unnamed protein product [Oppliella nova]  
MTSLNAISREYETNTFLCLSAAVSRPQRLSLRLPAPTPPATPTPVSDRQMAPKNGDKSIKTEGLFARIEGHLPGDQ  
SDAEFTPTPTLLILYKSRETFQAQKTPKMETLLKVSFLCIVCAFSFAAANKKVDKQTATTTGTTTAAANATTDKAPTID  
WGKCPQLEPKDAEKRAKAAVLETCLARHPIPANLTQETIESHQKAIACALRTEKWFTAKGNRYSKAENEIKAKKLPKD  
VESALLAHHKNCSEAKREFASKERVIDQIQLYQACMDYHITSACGIQLKDN  
>Onov\_CAD7650725 .1 unnamed protein product, partial [Oppliella nova]  
MSLWLAEHRQERQEFSAURLAIKHKDQTLATVFTHLFFDPNQQLPPFFGGQPSGPPQQHFFNPQQFLVQPNQQFNGQP  
PQAQPQLAQSQPSQPQLQAQPPAPQGPQINWGKCPQLEPSEKEKSTKAQVITKCLETTPLPPNITRD  
>Vdes\_XP\_022645714 .1 uncharacterized protein LOC111243821 [Varroa destructor]  
MKTFTIGLVLVGMAMAAPPASGGPEAGKPPTIEWGKCSQLKPSDSERMTKAAVVEKCVQSLPLPEAGKASQAEIEKHREDV  
TTCALKAEGWFDKGVYKFDRARDEIKNKKLASDIETPVLEKHAECQKEAGEKHTSDYIKQVQLYQACMDFNISQICGIK  
VVS  
>Vdes\_XP\_022672530 .1 uncharacterized protein LOC111255133 [Varroa destructor]  
MKVFVILALVGMAKAAPQAPASATPAKVPVIEWGKCEQLKPSSESERTSKAAVVDKCLQSLPLPDPEKATQQEIDKHRESV  
TTCALKAEGWFDDEGVYKFDRARNEIKNKKLDSEVEEAULLKHDACQKEATEKHDDYINQVQLYQACMDYNISQICGIKV  
MV  
>Vdes\_XP\_022653281 .1 uncharacterized protein LOC111247024 [Varroa destructor]  
MKTLLVALLASTACLTADTATGDHQPDSNQFGRWRTCLKSKIPENKQPGMEACINKPGGTDMSKFRRGLGCVLESYGIVNNHRVDL  
TKMRSSASLVTSPELKKAFMECPKDDKNSSLDRSIKCVIDHLETSCSAVKAQG  
>Vdes\_XP\_022653293 .1 uncharacterized protein LOC111247029 [Varroa destructor]  
MNAAVIVTAMLACCCSADTASGDHASDTSQFGKWRCLADKLPAKKREVFDECFIKPGGTDMNKFRRLNLCVLTSDGLL  
KNHKVDLKKMSMTAASAGSPELKKAYENCPKDDKNTSEDRSIKCLIDHLEVDCKLASK  
>Vdes\_XP\_022666940 .1 uncharacterized protein LOC111252778 [Varroa destructor]  
MHRSFVLQCCGLLFIVGLALAGPLAKDKSERITPKQTVEEFFTSNWGECEPLKNPLVLPEISDAATWERCVRHIPLSPDQ  
VEEALPNLSRCMLKVIWVRANGNMNLTKYMDYLSQAGLDDKTLELTAKHEKCSQRALSDGSGDYKEQDKIYVECFIRH  
FDKTCPPNFQAAVKQGYIVGITQISFVPRYDEVEVESDTEAETEGAGPSVADATGEAAANDNANGSGGPQ  
>Gocc\_XP\_003747300 .1 uncharacterized protein LOC100900705 [Galendromus occidentalis]  
MKIFFAVALTILVCEVSADTASGDHTSDSKFGKWRSCASKLPADKQKVHEDCFKKPGGTDMSKFRRGLSCVLDYSGVV  
KDHKIDQAKMASTATSTSPELKKAFTTECPKDDKNVSEDRITKVIDNLETCTCKLST  
>Gocc\_XP\_003742126 .1 uncharacterized protein LOC100907366 [Galendromus occidentalis]  
MNTFSCVLLGVLVAGACAGPIAKDKSERISPKQTVEEFFTSNWGSCEPLKNPLVLPEISDASTWERCRAHIPISPEQVEE  
ALPNLSRCMLKVIWVRPANGNMNLKYMDYLSQAGLDGKTLELTAKIAHEKCSRAFSQAANDYKEQDKIYVECFIRHFDK  
TCPPNFQAAVKQGYIVGITQISFVPRYDEVDEAGPVEEDAEPQQTQQEDSNSSIKDSDAQ  
>Gocc\_XP\_003741537 .1 uncharacterized protein LOC100907454 [Galendromus occidentalis]  
MKVFVLAALFVGLALAAPQAQGGASGGAPKNPIIEWGKCNQLKPSSEGERTSKAAVVDKCLQQLPLPDPEKASQAEIDKHRE  
SVTTCALKAEGWFDKGVYKFDRARNEIKNKKLDSEIESQVLVKHDECQKEATEKHDTFINQVQLYQACMDYNISQICGI  
KVMV  
>Tmer\_QOR73552 .1 hypothetical protein BIW11\_09656 [Tropilaelaps mercedesae]  
MKVFVVMALMGMAAPQAPAAPTSAPKAPVIEWGKCDQLKPSSENERSTKAAVVDKCLQSLPLPDPEKATQQEIDKHRESV  
TTCALKAEGWFDKGVYKFDRARNEIKNKKLDGEIEAAVLVKHDACQKEATEKHEDYINQVQLYQACMDYNISQICGIKV  
MV  
>Tmer\_QOR79252 .1 hypothetical protein BIW11\_05867 [Tropilaelaps mercedesae]  
MKTLLVIALIAGTACLAADIATGDHQPDTNQFGQWRTCLKSKIPQDKQATMDNCVKKPGGTDMAKFRRGISCVLESYGVV  
NGHRVDLRKMGSTASSVRSPELKKAFTTECPKDDKNASLDRSIKCVIDHLETSCPLVKAQG  
>Tmer\_QOR80083 .1 hypothetical protein BIW11\_00054, partial [Tropilaelaps mercedesae]  
VEQFFTSNWGECEPLKNPLVLPEISDGSWTWERCRAHIPLTPEQVEEALPNLSRCMLKVIWVRPANGNMNLTKYMDYLSQA  
LDDEKTLELTAKIAHEKCSQRALSDGAGNYKEQDKIYVECFIRHFDKTCPPNFQAAVKQGYIVGITQISFVPRYDDVEMEV  
GSDADAEDPNGAYPGPGADDANASSGSSNNNNKDDSNNNNKADSNDAQ  
>Emay\_OTF72123 .1 hypothetical protein BLA29\_010316, partial [Euroglyphus maynei]  
QLPRAPKINWGRCPQLEPTQRDIEAKSSILQECLRQNPQQSESITQEIIQREYKYEAKAEIKNKNLAKEMEKVLES  
HKQCSQIAKDRKQAVKNLSNVEQVQIYQGCMDAHITQNCQIQISAV  
>Hfla\_AYH64978 .1 immunogenic protein [Haemaphysalis flava]  
MVAFKAALFICALALPVYAQNAPAAEPQRPINWGKCPQLQPSKEERQQKALVIDTCLVKVPLPDVEHANETVIOQHRED  
VTTTALHSEGWFNKNQYRFDRARTEILNKKLAAEVQVLAKHDECKKEAEKFAHQFVAQVQLYQACMDYHISQICGI  
QIQALPQAGAAPPAQG  
>Hlon\_ADK47399 .1 immunogenic protein [Haemaphysalis longicornis]  
MVAFKAALFICALALPVYAQNAPAAEPQRPDINWGKCPQLQPSKEERQQKALAIDTCLVKVPLPDVEHANETVIOQHRED  
VTTTALHSEGWFNKNQYRFDRARTEILNKKLAAEVQVLAKHDECKKEAEKFAHQFVAQVQLYQACMDYHISQICGI  
QIQAGAPAGGVPPQPPQQG  
>Hqin\_AAX37829 .1 Hq05 [Haemaphysalis qinghaiensis]  
MVSLKAVLVFCALAFFTCVGSAPAAEPKQPEVNWGKCPQLKPTTEEEKQKQAVVDQCLDKIPIPDLTANETVILKHRED  
VTTTALKTEGWFNKNQYRFDRARTEISNKKLPADVQPVIAKHDECKKEAETKFPKNFIAQVQLYQACMDHHISQLCGV  
KIEGDSHGGHSAGGKKASA  
>Isca\_XP\_002399632 .1 uncharacterized protein LOC8038114 [Ixodes scapularis]  
MVAFKVSVAVLLCVGSFAFAPAGGKDLAAAQTQAGVPPRPQINWGKCPQLQPSSENERQQKALVIDQCLDKVPLPDVDTA  
NDTVIOQHREDVTTTALKTEGWFNQYRFDRARTEILNKKLAKDVEPVLSKHDECKKEAEKFAKNFVAQVQLYQAC  
MDYHISQICGIQIAQAAEAHPQGAQQG  
>Isca\_XP\_002433530 .1 uncharacterized protein LOC8051706 [Ixodes scapularis]

MKILLITVVVCFVFAATDASRRSTRRQQFTDWRNCMVEQLPSEKKPIYDACYNRSRGTDMHKFREGLKCVLTDYNLLNGTK  
 IDLAAMTTRASSVSGKLGQAFTDCPKDDHNRNAAGVKCIIDRLTDCPVPTGSTAH  
 >Iper\_KAG0425362 .1 hypothetical protein HPB47\_027463, partial [Ixodes persulcatus]  
 QQFNDWRACMVEQLPTEKKPIFEACHNRSRGTDMHKFREGLKCVLTDYNLLSGTKIDLAAMTTRASSVSGKLGQAFTDCP  
 KDDHNRNASKGVKCIIDRLT  
 >Isca\_XP\_002405987 .2 uncharacterized protein LOC8033800 [Ixodes scapularis]  
 MWTSAGKSALVTLGVLLAVGVGLGDAGPVDPKKTDKPEKQTIHEFFSSNWGACEPLKNPLVIPEMSNTTWWKCQKHLPE  
 HPQDIEEYLPRLSRCMLKSTGWVRSNGNMNLSKYLQYLSLLGLDDETMNGTREAHKGCIAKAYKEQDYKTQDKVYVECIF  
 KFFTSCSANFQGAKEGYIVGITQLSFMPRMGPLEVDDVEAEVSEDDAPQDVLPTNSTSTS  
 >Rmic\_XP\_037269043 .1 uncharacterized protein LOC119160877 [Rhipicephalus microplus]  
 MVAFAALILCVLVLPAYAQTAGAEPPRPEINWGKCPQLQPSKEERQQKALVIDTCLEKVPLPDVEHANETVIQQHREDV  
 TTCALHSEGWFNKNGQYRFDRARTEILNKKLAADVEPKVLAKHDECKKEAEKFAHQFVAQVQLYQACMDYHISQICGIQ  
 IQGGAGAPAHG  
 >Rsan\_XP\_037514317 .1 uncharacterized protein LOC119390702 [Rhipicephalus sanguineus]  
 MVAFAALILCVLVLPAYAQTAGAEPPRPEINWGKCPQLQPSKEERQQKALVIDTCLEKVPLPDVEHANETVIQQHREDV  
 TTCALHSEGWFNKNGQYRFDRARTEILNKKLAADVEPKVLAKHDECKKEAEKFAHQFVAQVQLYQACMDYHISQICGIQ  
 IQGAGGAPAHG  
 >Rsan\_XP\_037519114 .1 uncharacterized protein LOC119396095 [Rhipicephalus sanguineus]  
 MKTAVVLVLAACLAVAVAMSAGGRHSASREDFSRWRECMITKLPQDRIQTYETCRNQSRGTEMRRFRQGLECVLSSYNLVN  
 RTDVDLSRMQQAQNVNQQLRAAFQECQDENNKVKGVKAVKCLIDHLETSCPVPAGVNRE  
 >Rmic\_XP\_037281056 .1 uncharacterized protein LOC119174308 [Rhipicephalus microplus]  
 MKTALVLALTACLAVAVAMSVGGRISSPQDFARWRDCMVAKLPEDKVQTYENCNHSRGTDMRKFRQGLECVLSSYNLVN  
 RTDVDLSRMQHLAQNTIQPEVRAAFQECQDENNKVKGVKAVKCFIDHLETSCPVPDATKRE  
 >Rsan\_XP\_037519110 .1 uncharacterized protein LOC119396094 isoform X1 [Rhipicephalus  
 sanguineus]  
 MKTAVVLVLVACFVAVATSADKDRATSRRQQFDNWRGCMVQKIPKDKAPVYEACHNRSRGTDMRFRDGLQCVLSSYNIVN  
 KNDVNLERMAQLAKDITQQDLKGAFQECPKNDRNKSQRTVVKCVIDHLEKTVPCARWRCWSQGVRR  
 >Rsan\_XP\_037519113 .1 uncharacterized protein LOC119396094 isoform X2 [Rhipicephalus  
 sanguineus]  
 MKTAVVLVLVACFVAVATSADKDRATSRRQQFDNWRGCMVQKIPKDKAPVYEACHNRSRGTDMRFRDGLQCVLSSYNIVN  
 KNDVNLERMAQLAKDITQQDLKGAFQECPKNDRNKSQRTVVKCVIDHLEKCPVPDGAAGARE  
 >Rmic\_XP\_037281055 .1 uncharacterized protein LOC119174307 [Rhipicephalus microplus]  
 MKTAVVLLLVTCFVALATSADKDRATNHRQQFDNWRSCMVQKIPVDKVPQYDACHGRSRGTDMRFRDGLQCVLSSYNIVN  
 KNDVNLERMAQLARTITQQDLKSAFEECPKNDRNKHVQRAVKCVIDHLETCVPDPGAAGSRE  
 >Rsan\_XP\_037524362 .1 uncharacterized protein LOC119401543 [Rhipicephalus sanguineus]  
 MRDQLYHVLLVTFWSWLGSAVAGPLEKPEKGDKEGSKQTIQEFFTSDWGACEPLKNPLVIPEMSDPQTWIRCQKHLPEHP  
 SDIEEYLPRLSRCMLKSTGWVRSNGNMNLSKYLQYLSLLGLDNETMDSTREAHKGCISKAYKETDFKTQDKLYVECFKH  
 FTKVCGPNFQGAKEGYIVGITQLSFMPRMGPLEVDDVDDDDVVETPPEETAPRAFNETTPIEP  
 >Rmic\_XP\_037273696 .1 uncharacterized protein LOC119165718 [Rhipicephalus microplus]  
 MRDQLHHVLLVTFWALGSAVAGPIEKPEKGDKGKQTIQEFFTSDWGACEPLKNPLVIPEMSDPQTWIRCQKHLDPHP  
 SDIEEYLPRLSRCMLKSTGWVRSNGNMNLSKYLQYLSLLGLDNETMNSTREAHKGCISKAYKETDFKTQDKLYVECFKH  
 FTKVCGPNFQGAKEGYIVGITQLSFMPRMGPMEVDDVDDDDVVETPPEEPAPRPVNETATIEP  
 >Dsil\_XP\_037560530 .1 uncharacterized protein LOC119437592 [Dermacentor silvarum]  
 MVAFAALILCALVLPAYAQTAGAEPPRPEINWGKCPQLQPSKEERQQKALVIDTCLEKVPLPDVEHANETVIQQHREDV  
 TTCALHSEGWFNKNGQYRFDRARTEILNKKLAADVEPKVLAKHDECKKEAEKFAHQFVAQVQLYQACMDYHISQICGIQ  
 IQGGPQAGAPAHG  
 >Dsil\_XP\_037578762 .1 uncharacterized protein LOC119461497 [Dermacentor silvarum]  
 MKTAVVLVLTACLAVAVAMSAGGRASTRQFSRWRCMVGKLPAEKVQTYEDCRNHSRGTEMRRFRQGLECVLSSYNLVN  
 RNDVDLARMRELAQSVTQDRTEGGLPRVPPGRRQQESRKGCVEVRH  
 >Dsil\_XP\_037581089 .1 uncharacterized protein LOC119464249 [Dermacentor silvarum]  
 MREQVSHVLLVTFWALGSAVAGPIEKPEKGDKIGKQTIQEFFTSDWGACEPLKNPLVIPEMSDPQTWIRCQKHLPEHPS  
 DIEEYLPRLSRCMLKSTGWVRSNGNMNLSKYLQYLSLLGLDNETMDSTREAHKGCISKAYKETDFKTQDKLYVECFRHF  
 TKVCGANFQGAKEGYIVGITQLSFMPRMGPLEVDDVDGDDVVETPPGEERVPRPINETATIEP

**Table S3. Ligands tested with the four TurtOBPs**

| Ligand                           | OBP1                | OBP4 | OBP2                 | OBP3 |
|----------------------------------|---------------------|------|----------------------|------|
|                                  | Competitive binding |      | Tryptophan quenching |      |
| 1-NPN                            | v                   | v    | v                    | v    |
| Coniferyl aldehyde               | v                   | v    | v                    | v    |
| Vanillin                         | v                   | v    | v                    | v    |
| $\beta$ -Ionone                  | v                   | v    | v                    | v    |
| Safranal                         | v                   | v    | v                    | v    |
| Eugenol                          | v                   | v    | v                    | v    |
| Farnesol                         | v                   |      |                      |      |
| ( <i>E</i> )- $\beta$ -Farnesene | v                   | v    |                      | v    |
| Methyl jasmonate                 | v                   |      |                      |      |
| Linalool                         | v                   | v    |                      |      |
| Decanal                          | v                   |      |                      |      |
| ( <i>Z</i> )-3-Hexenol           | v                   |      |                      |      |
| Hexanal                          | v                   |      |                      |      |
| Dopamine                         | v                   | v    |                      |      |
| Decanoic acid                    | v                   |      |                      |      |
| Geranyl acetone                  | v                   |      |                      | v    |
| Z11-Hexadecenal                  |                     | v    |                      |      |
| Farnesol                         |                     | v    |                      |      |
| Oleic acid                       |                     | v    |                      |      |
| 8-Pentadecanone                  |                     | v    |                      |      |
| Citral                           |                     | v    |                      | v    |
| Benzyl cyanide                   |                     |      | v                    | v    |
| Methoxyeugenol                   |                     |      | v                    | v    |
| 4-Methylcathecol                 |                     |      | v                    | v    |
| <i>p</i> -Isopropylphenol        |                     |      | v                    | v    |
| $\alpha$ -Methoxycinnamaldehyde  |                     |      | v                    |      |
| $\alpha$ -Pentylcinnamaldehyde   |                     |      | v                    | v    |
| Carvacrol                        |                     |      | v                    | v    |
| Methoxyvinylphenol               |                     |      | v                    |      |
| <i>p-tert</i> -Butylbenzaldehyde |                     |      | v                    | v    |
| Thymol                           |                     |      | v                    |      |
| Homovanillic alcohol             |                     |      | v                    |      |
| Cyclamen aldehyde                |                     |      | v                    | v    |
| Piperonyl alcohol                |                     |      | v                    |      |
| Octanoic acid                    |                     |      |                      | v    |
| Decanoic acid                    |                     |      |                      | v    |
| Dodecanoic acid                  |                     |      |                      | v    |
| Methyleugenol                    |                     |      |                      | v    |
| $\beta$ -Caryophyllene           | v                   |      |                      | v    |
| Geraniol                         | v                   |      |                      | v    |
| Santalol                         | v                   |      |                      | v    |
| $\beta$ -Pinene                  | v                   |      |                      | v    |

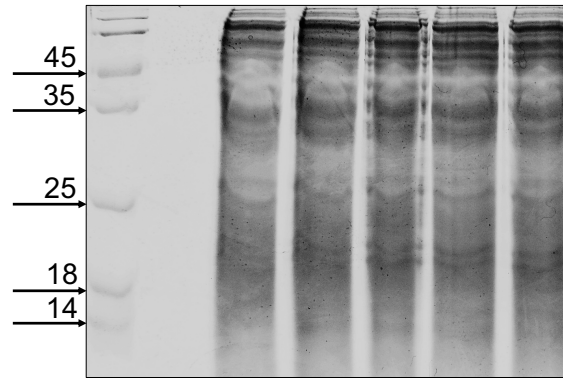

**Figure S1.** Electrophoretic separation of a crude extract of whole *T. urticae* proteins used for proteomic analysis. The region between apparent molecular mass 12-30 kDa was excised from the five lanes (all loaded with the same sample), pooled and subjected to proteomic analysis as described in the Material and Methods section.

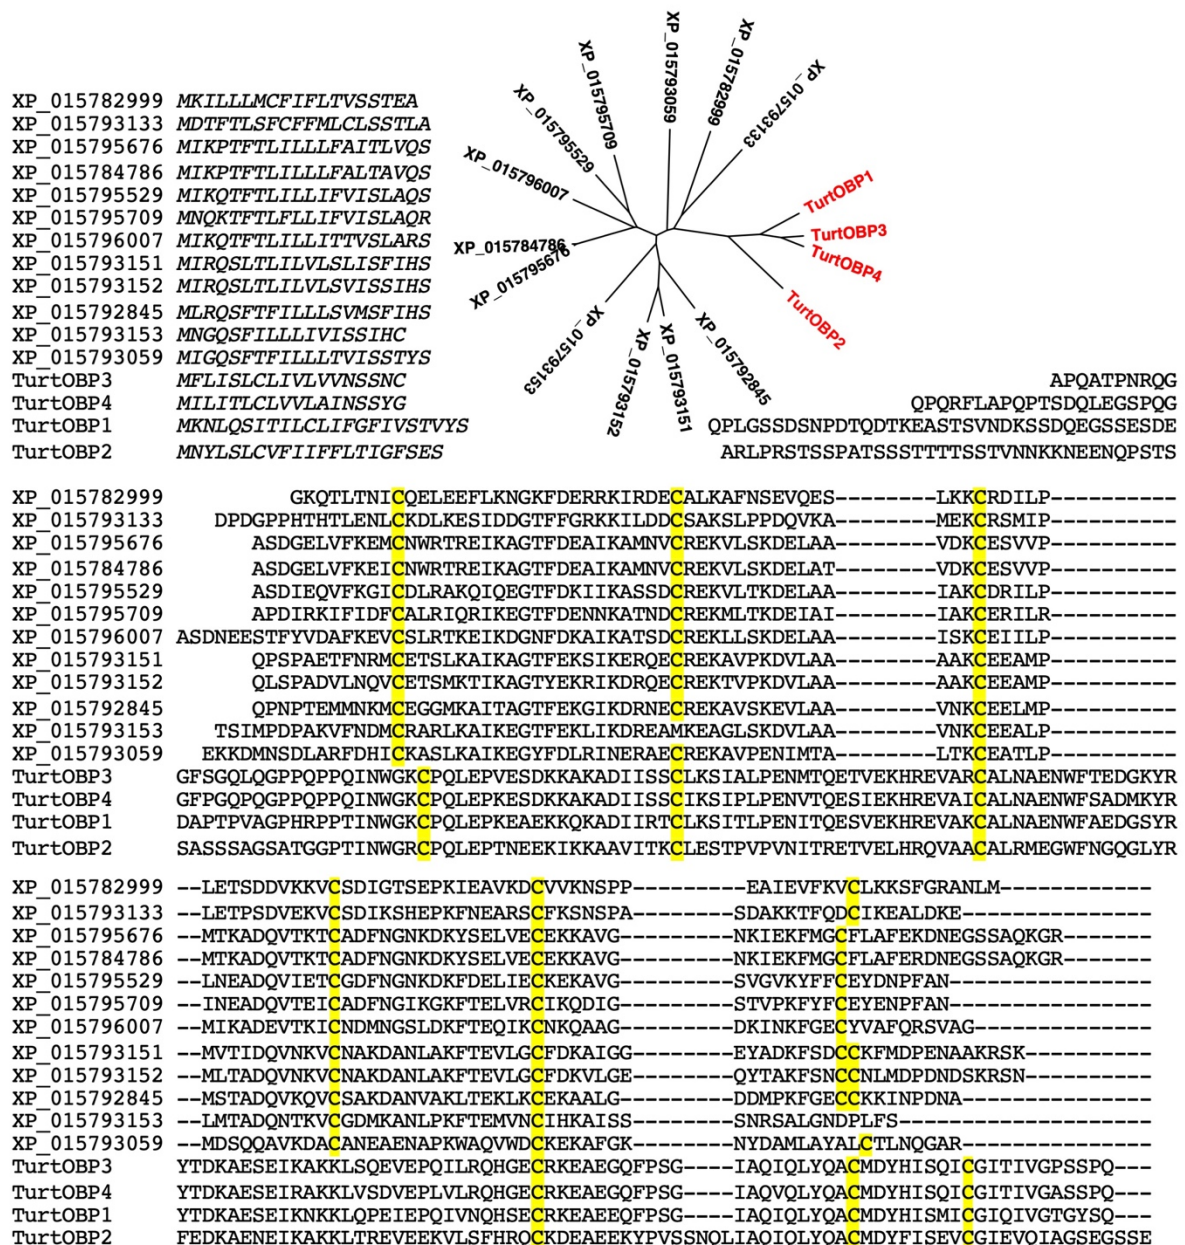

**Figure S2.** Alignment of four TurtOBPs with 12 sequences of a putative second OBP family of OBPs in *T. urticae*. Identity values between members of the two groups of proteins are around 10-15% at the amino acid level. Such low similarity is still significant, considering also the alignment of most of the cysteine residues.

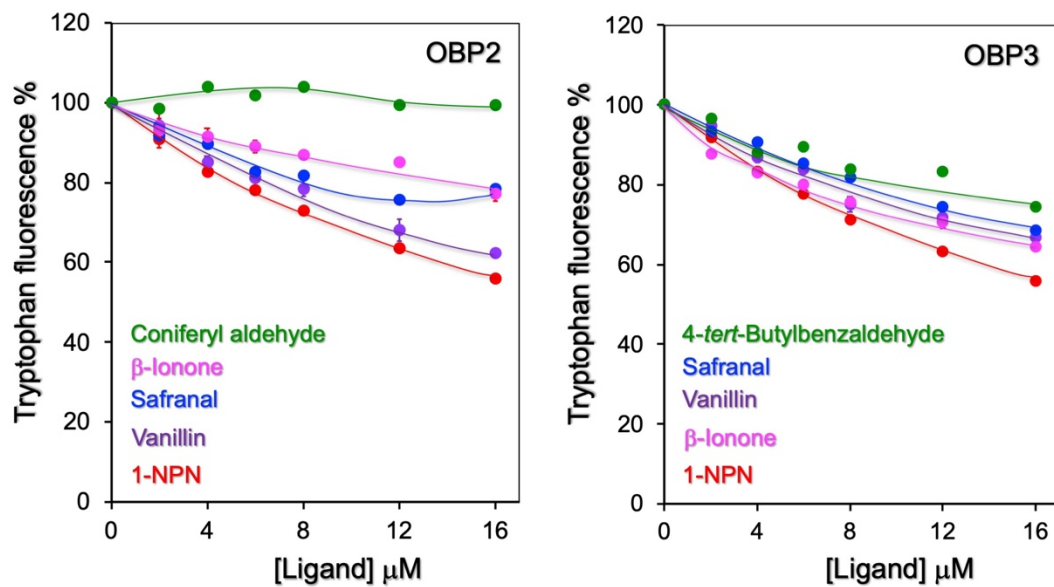

**Figure S3.** Quenching of the intrinsic tryptophan fluorescence of TurtOBP2 and TurtOBP3 by selected ligands.



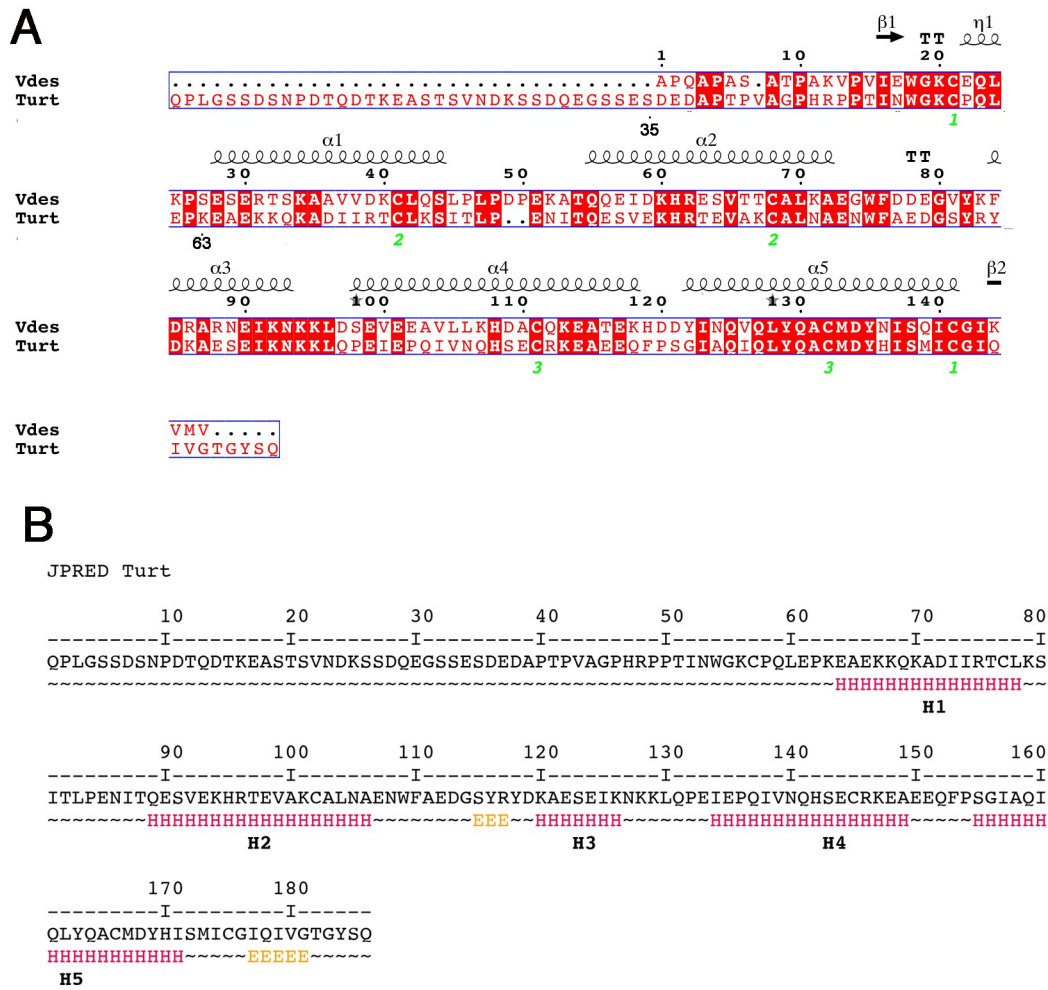

**Figure S4.** Secondary structure analysis of OBP1 from *T. urticae* and *V. destructor*. A. Sequence alignment of these OBPs was performed with Multalin [43] and EsPrit [44], which allow to superimpose sequence data with secondary structure. B. The secondary structure analysis of TurtOBP1 was also performed with Jpred4 [45] using standard parameters.

A

## Summary statistics

|                         |                           |             |        |                                |
|-------------------------|---------------------------|-------------|--------|--------------------------------|
| Protein Geometry        | Poor rotamers             | 1           | 0.83%  | Goal: <0.3%                    |
|                         | Favored rotamers          | 117         | 96.69% | Goal: >98%                     |
|                         | Ramachandran outliers     | 1           | 0.74%  | Goal: <0.05%                   |
|                         | Ramachandran favored      | 127         | 93.38% | Goal: >98%                     |
|                         | Rama distribution Z-score | 2.53 ± 0.72 |        | Goal: abs(Z score) < 2         |
|                         | Cβ deviations >0.25Å      | 0           | 0.00%  | Goal: 0                        |
|                         | Bad bonds:                | 0 / 1124    | 0.00%  | Goal: 0%                       |
| Peptide Omegas          | Bad angles:               | 7 / 1517    | 0.46%  | Goal: <0.1%                    |
|                         | Cis Prolines:             | 0 / 9       | 0.00%  | Expected: ≤1 per chain, or ≤5% |
| Low-resolution Criteria | CaBLAM outliers           | 1           | 0.7%   | Goal: <1.0%                    |
|                         | CA Geometry outliers      | 0           | 0.00%  | Goal: <0.5%                    |
| Additional validations  | Chiral volume outliers    | 0/161       |        |                                |

In the two column results, the left column gives the raw count, right column gives the percentage.  
 Key to table colors and cutoffs here: [P](#)

B

## MolProbity Ramachandran analysis

model-plm-coot-1.pdb, model 1

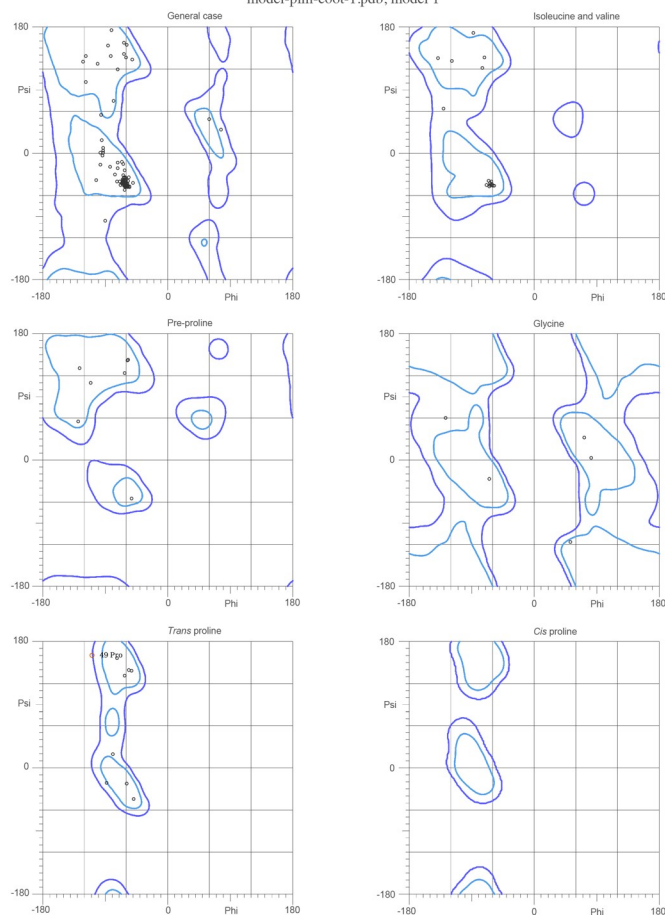

Figure S5. Output files from Molprobity

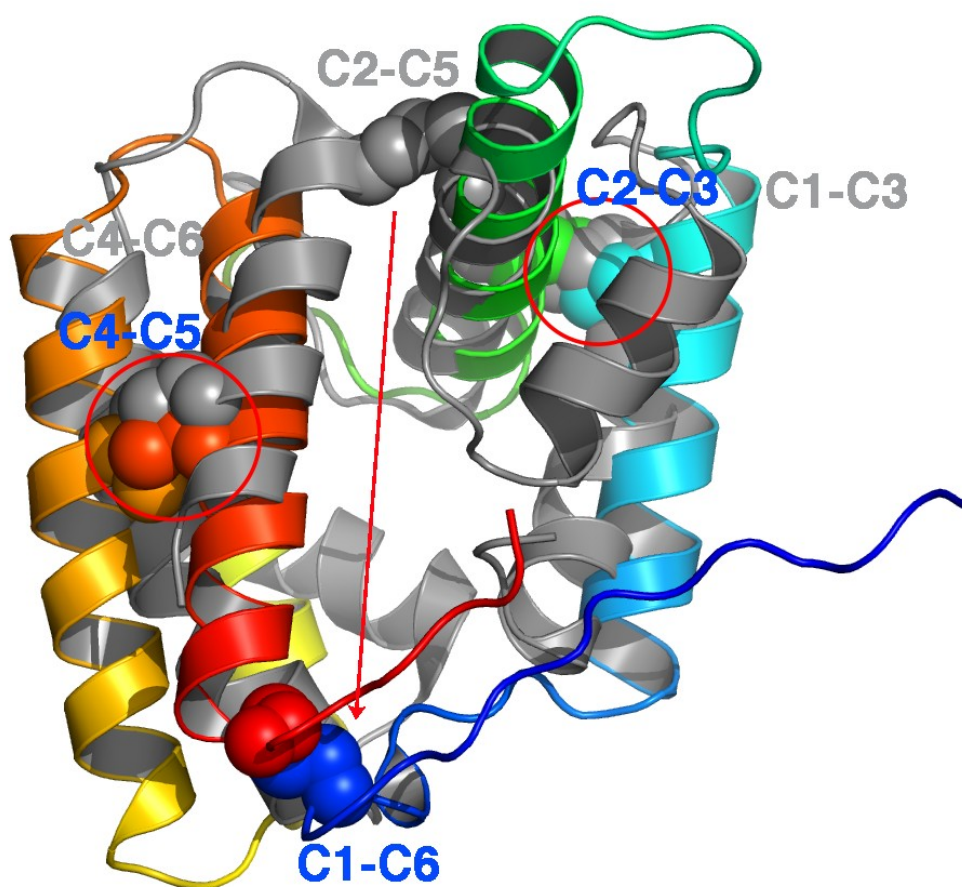

**Figure S6.** Ribbon view of the structure of TurtOBP1 model superimposed to that of the classical OBP fold of LmadPBP. TurtOBP1 is rainbow colored, LmadPBP is colored grey. The three disulfide bridges of each structure are displayed as atomic spheres. The superimposed disulfide bridges are identified by a red circle, while the C2- C5 disulfide of the classical OBP fold is displaced at the opposite end of the molecule in TurtOBP1 (red arrow).
